# Supplementary material for: Can 3D RVEF be Prognostic for the Non-Ischemic Cardiomyopathy Patient but Not the Ischemic Cardiomyopathy Patient? A Cardiovascular MRI Study
Source: MDPI journal article supplement (doi:10.3390/diagnostics9010016), 2019-01-23
Supplement: s1 [file s1]

**Table S1: Exclusion Criteria For Our Study Subjects**

- Combined ICMX and NICMX
- Ordinal reporting of the RVEF
- LVEF > 35%
- Patients lacking follow-up data for alive-dead status or MACE were excluded from the KM analysis comparing the EF sub groups in ICMX and NICMX patients
